# Supplementary material for: Evidence of electric field-tunable tunneling probability in graphene and metal contact
Source: Royal Society of Chemistry journal article supplement (doi:10.1039/c7nr02502e), 2017-01-01
Supplement: c7nr02502e1.pdf [file c7nr02502e1.pdf]

## Supporting Information for

# Evidence of electric field tunable tunneling probability in graphene and metal contact

*Songang Peng,<sup>a,b</sup> Zhi Jin,<sup>\*a</sup> Dayong Zhang,<sup>a,b</sup> Jingyuan Shi,<sup>a</sup> Yanhui Zhang,<sup>c</sup> and Guanghui Yu<sup>c</sup>*

<sup>a</sup> High-Frequency High-Voltage Device and Integrated Circuits R&D Center, Institute of Microelectronics, Chinese Academy of Sciences, 100029, China,

<sup>b</sup> Key Laboratory of Microelectronic Devices & Integrated Technology, Institute of Microelectronics, Chinese Academy of Sciences, 100029, China,

<sup>c</sup> State Key Laboratory of Functional Material for Informatics, Shanghai Institute of Microsystem and Information Technology, Chinese Academy of Sciences, Shanghai 200050, China

\*To whom correspondence should be addressed. \*E-mail: jinzhi@ime.ac.cn.

## I. Deriving the eq 3 in the main text

Here, we derive the eq 3 in the main text step by step.

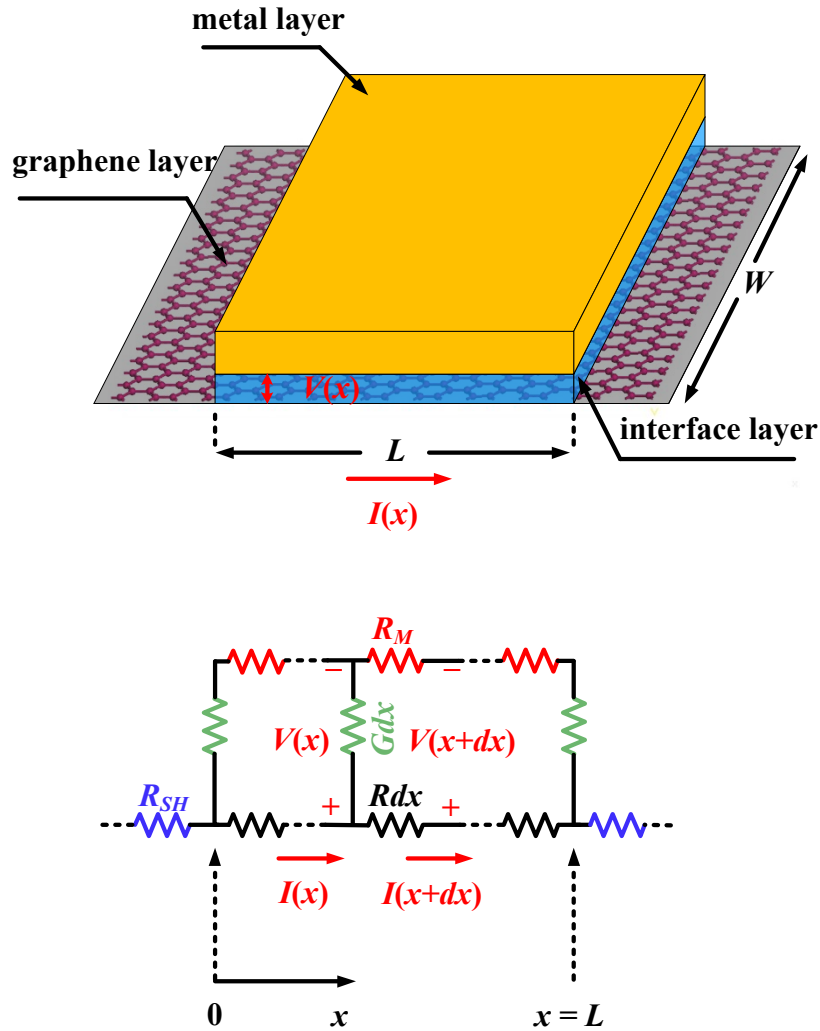

**Figure S1** Diagram of the metal/graphene contact region and the corresponding transmission line contact model

Figure S1 shows the diagram of the metal/graphene contact region and the corresponding transmission line contact model. The contact between contact metal and graphene layer can be described as the resistive network, which is obtained by slicing the structure into small sections with length  $dx$ . The resistance of the graphene layer under contact corresponds to the series resistance  $R$  of the transmission line, and the interface resistance is the counterpart of the parallel conductance  $G$ . They are given by:

$$R = \frac{R_{SK}}{W}, \quad (S1)$$

$$G = \frac{W}{\rho_c}, \quad (S2)$$

where  $R_{SK}$  is the sheet resistance of graphene under contact with units of  $\Omega/\square$ , which is different from  $R_{SH}$  at the outside contact region,  $\rho_c$  is the specific contact resistivity with units of  $\Omega\text{cm}^2$  and  $W$  is the width of the contact. In addition, the resistance of metal layer  $R_M$  can be neglected because it is much smaller than the other resistances.

Using Kirchoff's laws, we can obtain the following relationships between the voltages and currents at  $x$  and  $x + dx$ .

$$V(x + dx) - V(x) = -I(x + dx)Rdx \quad (S3)$$

$$I(x + dx) - I(x) = -V(x)Gdx \quad (S4)$$

When  $dx$  approaches zero, we get the following differential equations for the current,  $I(x)$ , and voltage,  $V(x)$ :

$$\frac{dV(x)}{dx} = -I(x)R \quad (S5)$$

$$\frac{dI(x)}{dx} = -V(x)G \quad (S6)$$

Equations S5 and S6 then can be combined into the following equation:

$$\frac{d^2V(x)}{dx^2} + \alpha^2V(x) = 0, \quad (S7)$$

where  $\alpha = \sqrt{\rho_c/R_{SK}}$ .

The general solution of eq S7 can be written as:

$$V(x) = A_1e^{\alpha x} + A_2e^{-\alpha x} \quad (S8)$$

Substituting eq S8 back into eq S5, we obtain the corresponding solution for the current as follows:

$$I(x) = -\frac{1}{Z_0}(A_1e^{\alpha x} - A_2e^{-\alpha x}), \quad (S9)$$

where  $Z_0 = \sqrt{R_{SK}\rho_c}/W$ .

Considering the boundary conditions,  $I(x = 0) = I$  and  $I(x = L) = 0$ , the final

solution for voltage can be expressed as:

$$V(x) = \frac{IZ_0 \cosh \alpha(L-x)}{\sinh \alpha L} = \frac{I\sqrt{R_{SK}\rho_C} \cosh[(L-x)/L_T]}{W \sinh(L/L_T)}. \quad (\text{S10})$$

The voltage is highest at the contact edge  $x = 0$  and drops exponentially with distance. The distance over which the voltage drops to  $1/e$  of  $V(0)$  is defined as the transfer length  $L_T$ :

$$L_T = 1/\alpha = \sqrt{\rho_C/R_{SK}} \quad (\text{S11})$$

By making use of properly designed test structures, two unique measurements of the metal/graphene contact can be made. One is the contact front resistance,  $R_{CF}$ , defined as the voltage drop across the interface layer at the edge of the contact where the current density is highest,  $V(x = 0)$ , to the total current flowing into the contact,  $I(x = 0)$ . The other is the contact end resistance,  $R_{CE}$ , defined as the ratio of the voltage drop across the interface layer at the edge of the contact where the current density is least,  $V(x = L)$ , to the total current flowing into the contact,  $I(x = 0)$ . According to eq S10, the  $R_{CF}$  and  $R_{CE}$  can be expressed as:

$$R_{CF} = \frac{V(x=0)}{I(x=0)} = \frac{\sqrt{R_{SK}\rho_C}}{W} \coth(L/L_T) = \frac{\rho_C}{WL_T} \coth(L/L_T) \quad (\text{S12})$$

$$R_{CE} = \frac{V(x=L)}{I(x=0)} = \frac{\sqrt{R_{SK}\rho_C}}{W} \frac{1}{\sinh(L/L_T)} = \frac{\rho_C}{WL_T} \frac{1}{\sinh(L/L_T)} \quad (\text{S13})$$

Then, equations S12 and S13 can be combined into the eq 3 in the main text.

## II. Measurement processes of $R_{CF}$ and $R_{CE}$

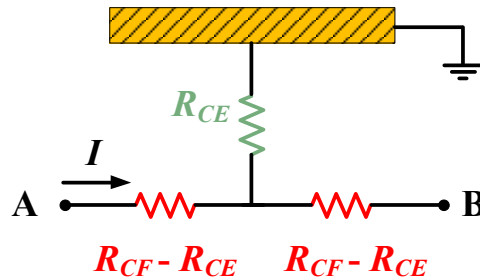

**Figure S2** Equivalent circuit of a single contact showing the contact front and end

resistances.

Figure S2 shows the simple equivalent circuit under the contact suggested by equations S12 and S13. When current  $I$  flows into the contact, the resistance between A and ground is  $R_{CF}$  and that between B and ground is  $R_{CE}$  (Here,  $I$  at  $x = L$  is assumed to be very small and can be omitted compared to  $I$  at  $x = 0$ . The assumption is correct in our measurement due to  $L > L_T$ ).

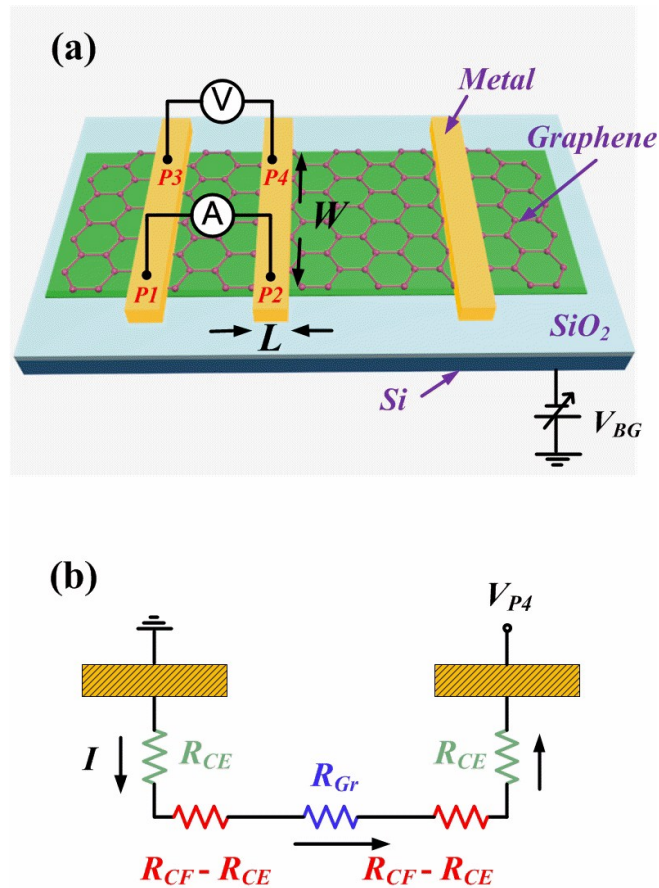

**Figure S3** (a) Schematic of test structure for achieving  $R_{CF}$ . (b) The corresponding equivalent circuit.

The measurements for  $R_{CF}$  and  $R_{CE}$  are carried out in vacuum at room temperature through B1500 semiconductor parameter analyzer using four probes:  $P1$ ,

$P2$ ,  $P3$  and  $P4$ . The silicon substrate was used as back gate. To obtain  $R_{CF}$  in TLM test structures, the voltage and current at same contacts are measured, as shown in Figure S3a.  $P1$  and  $P2$  are set to a voltage mode, which are used for providing current.  $P1$  is grounded and  $P2$  is with various voltages from -1 V to 1 V by a step of 0.01 V.  $P3$  and  $P4$  are set to a current mode, which are used for detecting voltage. The current flowing into  $P3$  and  $P4$  are set to zero. The voltage between the two contacts  $V_T$  is equal to  $V_{P4} - V_{P3}$ . Based on the equivalent circuit of the test structure for  $R_{CF}$  measurement shown in Figure S3b, the measured total resistance ( $R_T$ ) consists of two components:

$$R_T = -\frac{V_{P4}}{I} = 2R_{CF} + R_{Gr} \quad (\text{S14})$$

where  $R_{Gr}$  is the resistance of graphene in channel, which can be expressed as :

$$R_{Gr} = R_{SH} \frac{L_X}{W} \quad (\text{S15})$$

As a result, the measured total resistance between two contacts is given by:

$$R_T = 2R_{CF} + R_{SH} \frac{L_X}{W} \quad (\text{S16})$$

We measured the total resistances between two contacts with four different spacings ( $L_X$ ) and the total resistance is linearly dependent on the spacing (shown in Figure 1c of main text). When the spacing approaches zero, the y-intercept would be just twice the contact front resistance.

(a)

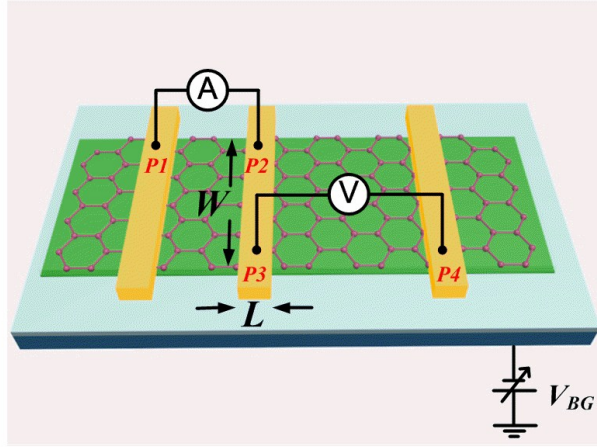

(b)

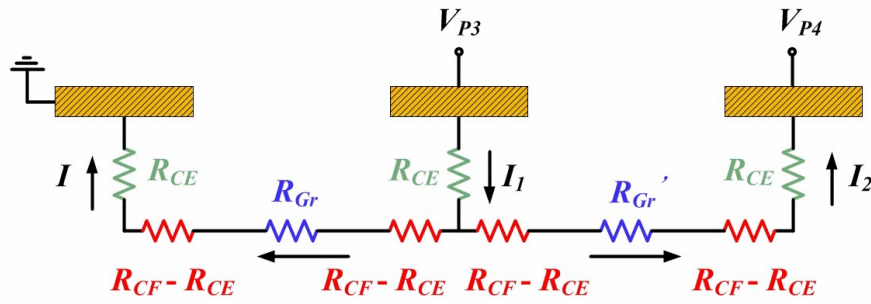

**Figure S4** (a) Schematic of test structure for achieving  $R_{CE}$ . (b) The corresponding equivalent circuit.

To achieve  $R_{CE}$ , the voltage is measured between two contacts along with current flowing across the other two contacts beside them (shown in Figure S4a).  $P1$  and  $P2$  are set to a voltage mode, which are used for providing current.  $P1$  is grounded and  $P2$  is with various voltages from -1 V to 1 V by a step of 0.01 V.  $P3$  and  $P4$  are set to a current mode, which are used for detecting voltage. The current flowing into  $P3$  and  $P4$  are set to zero. The voltage between the two contacts  $V_T$  is equal to  $V_{P4} - V_{P3}$ . Based on the corresponding equivalent circuit of the test structure for  $R_{CE}$  (shown in Figure S4b),  $V_{P3}$  and  $V_{P4}$  can be given by:

$$V_{P3} = I(R_{CE} + R_{CF} - R_{CE} + R_{Gr} + R_{CF} - R_{CE}) + I_1 R_{CE} \quad (S17)$$

$$V_{P4} = I(R_{CE} + R_{CF} - R_{CE} + R_{Gr} + R_{CF} - R_{CE}) + I_2(R_{CF} - R_{CE} + R_{Gr} + R_{CF} - R_{CE} + R_{CE}) \quad (S18)$$

and thus

$$\frac{V_{P4} - V_{P3}}{I} = \frac{I_2(R_{CF} - R_{CE} + R_{Gr} + R_{CF} - R_{CE} + R_{CE}) - I_1 R_{CE}}{I} \quad (S19)$$

Since the current drops nearly exponentially with contact distance,  $I_2$  is much smaller than  $I_1$ . Thus,  $I_1$  is almost equal to  $I$  and eq S19 is then expressed as:

$$\frac{V_{P4} - V_{P3}}{I} = -\frac{-I_1 R_{CE}}{I} = R_{CE} \quad (S20)$$

### III. Calculating processes of $\lambda$ and $\lambda_m$

According to Xia's study, the transfer length ( $L_T$ ) and tunneling probability ( $T$ ) can be expressed as the following equations<sup>1</sup>:

$$L_T = \sqrt{\lambda \lambda_m}, \quad (S21)$$

$$T = \sqrt{\lambda / (\lambda + \lambda_m)}, \quad (S22)$$

Where  $\lambda$  is the scattering mean free path and  $\lambda_m$  is effective coupling length. Based on eq S21,  $\lambda_m$  can be given by:

$$\lambda_m = L_T^2 / \lambda, \quad (S23)$$

Substituting eq S23 back into eq S22, we obtain the expression of  $\lambda$  as follows:

$$\lambda = L_T T / \sqrt{1 - T^2}, \quad (S24)$$

Then, substituting eq S24 into eq S23, the expression of  $\lambda_m$  is given as follows:

$$\lambda_m = \left( L_T \sqrt{1 - T^2} \right) / T, \quad (S25)$$

The values of  $L_T$  at different  $V_{BG}$  are given in Fig. 2b in the main manuscript (the red line). The values of  $T$  at different  $V_{BG}$  are given in Fig. 4a in the main



manuscript (the blue line). Based on eq S24 and eq S25, the values of  $\lambda$  and  $\lambda_m$  at different  $V_{BG}$  can be finally obtained.

Reference:

1. F. N. Xia, V. Perebeinos, Y. M. Lin, Y. Q. Wu, and P. Avouris, Nat Nanotechol. 2011. 6, 179-184.
